# Supplementary material for: Brookite TiO2 as a low-temperature solution-processed mesoporous layer for hybrid perovskite solar cells
Source: Royal Society of Chemistry journal article supplement (doi:10.1039/c5ta06177f), 2015-01-01
Supplement: c5ta06177f1.pdf [file c5ta06177f1.pdf]

## Supplementary Information

# Brookite TiO<sub>2</sub> as low-temperature solution-processed mesoporous layer for hybrid perovskite solar cell

*Atsushi Kogo\**, *Yoshitaka Sanehira*, *Masashi Ikegami*, *Tsutomu Miyasaka\**

Graduate School of Engineering, Toin University of Yokohama, 1614 Kurogane-cho, Aoba,

Yokohama, Kanagawa, 225-8503, Japan

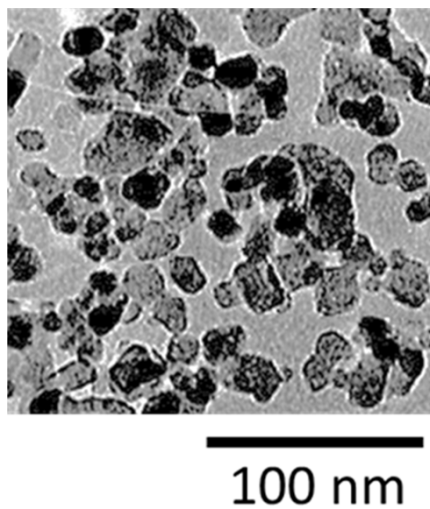

**Supplementary Figure 1.** SEM images of brookite  $\text{TiO}_2$  particles suspended in the precursor solution.

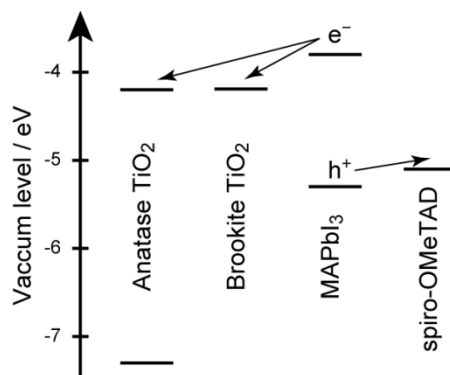

**Supplementary Figure 2.** Band diagram for brookite, anatase and  $\text{CH}_3\text{NH}_3\text{PbI}_{3-x}\text{Cl}_x$  perovskite materials.<sup>1,2</sup>

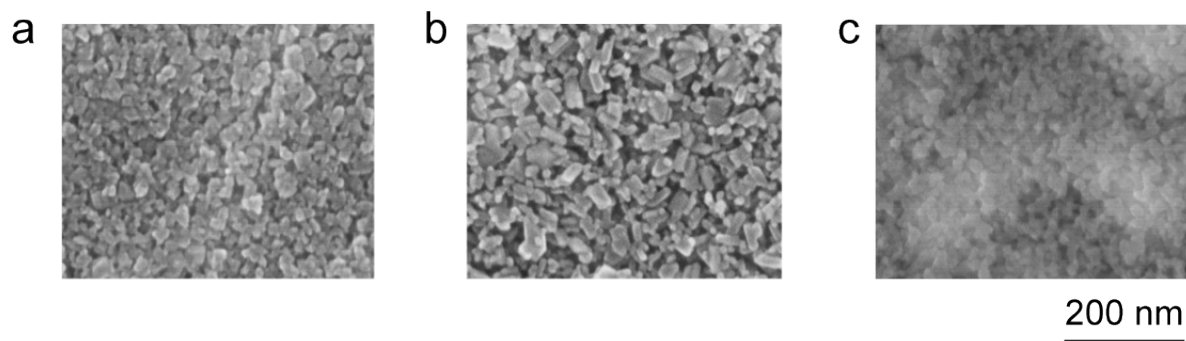

**Supplementary Figure 3.** SEM images of (a) brookite TiO<sub>2</sub>, (b) anatase TiO<sub>2</sub>, and (c) Al<sub>2</sub>O<sub>3</sub> mp layers.

#### References

1. J. T.-W. Wang, J. M. Ball, E. M. Barea, A. Abate, J. A. Alexander-Webber, J. Huang, M. Saliba, I. Mora-Sero, J. Bisquert, H. J. Snaith and R. J. Nicholas, *Nano Lett.*, 2014, **14**, 724-730.
2. A. D. Paola, M. Bellardita and L. Palmisano, *Catalysts*, 2013, **3**, 36-73.
